# Supplementary material for: Carbon nanotube and graphene oxide directed electrochemical synthesis of silver dendrites
Source: Royal Society of Chemistry journal article supplement (doi:10.1039/c4ra06156j), 2014-01-01
Supplement: c4ra06156j1.pdf [file c4ra06156j1.pdf]

## Supplementary Material

Title: Carbon Nanotube and Graphene Oxide Directed Electrochemical Synthesis of Silver Dendrites

Li Fu, Guosong Lai, Peter J. Mahon, James Wang, Deming Zhu, Baohua Jia, François Malherbe and Aimin Yu\*

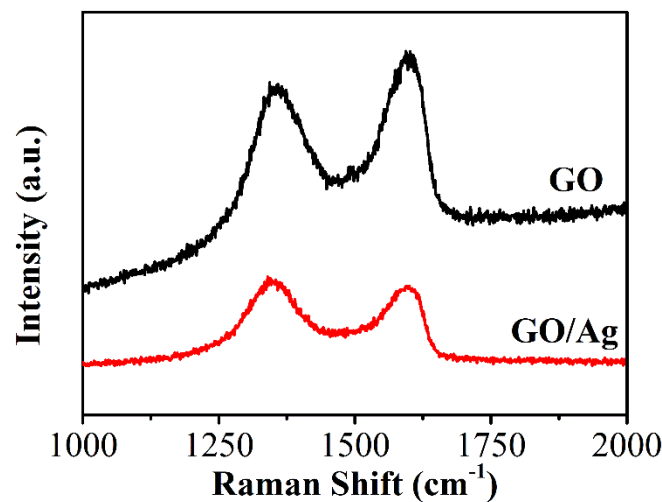

Fig. S1 Raman spectra of GO and GO/Ag.

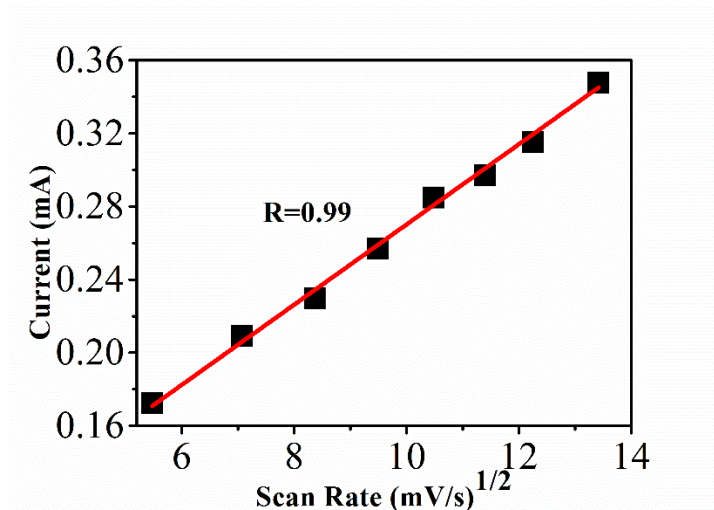

Fig. S2 The corresponding plot of current response vs the square root of scan rate.
